# Supplementary material
Source: publisher figshare collection journal article supplement (https://rs.figshare.com/ndownloader/files/25431566)
Supplement: Supplementary file 1 [file 25431566]

| **Table S4.** Best model based on AICc for every combination of phylogenetic hypothesis and map source and their respective adjusted R2. JT = *birdtree.org* MCC tree; ML = Maximum Likelihood tree; BI = Bayesian Inference; ENM = Ecological Niche Model. | |
| --- | --- |
| **Dataset / Best model** | **R2** | |
| *JT tree / BirdLife maps* |  | |
| Range Size ~ HWI‡ + Habitat* (F2,40 = 5.14; p = 0.01) | 0.164 | |
| *JT tree / ENM maps* |  | |
| Range Size ~ HWI† (F1,41 = 4.57; p = 0.038) | 0.078 | |
| *ML tree / BirdLife maps* |  | |
| Range Size ~ HWI† (F1,40 = 5.64; p = 0.022) | 0.101 | |
| *ML tree / ENM maps* |  | |
| Range Size ~ HWI† (F1,40 = 4.38; p = 0.042) | 0.076 | |
| *BI tree / BirdLife maps* |  | |
| Range Size ~ HWI* + Habitat† (F2,37 = 4.62; p = 0.016) | 0.156 | |
| *BI tree / ENM maps* |  | |
| Range Size ~ HWI* (F1,38 = 3.47; p = 0.07) | 0.059 | |
| ** 0.1 < p < 0.05*  † *p < 0.05*  ‡ *p < 0.01* |  | |  |
